# Supplementary material
Source: publisher figshare collection journal article supplement (https://karger.figshare.com/ndownloader/files/24118430)
Supplement: Supplementary file 1 [file 24118430]

# Supplemental Data for: *Parkinson’s disease-related motor and non-motor symptoms are not more prevalent in the Lancaster Amish*

Michael D.F. Goldenberg, Xuemei Huang, Honglei Chen, Lan Kong, Teodor T. Postolache, John W. Stiller, Katherine A. Ryan, Mary Pavlovich, Toni I. Pollin, Alan R. Shuldiner, Richard B. Mailman, Braxton D. Mitchell

## Supplementary Table 1. The nine-item Parkinson’s disease screening questionnaire and sensitivity and specificity reported by Rocca et al. [1]

| **Questions** | **Sensitivity** | **Specificity** |
| --- | --- | --- |
| Do you have trouble rising from a chair? | 75.7 | 62.5 |
| Is your handwriting smaller than it once was? | 73.0 | 87.5 |
| Do people tell you that your voice is softer than it once was? | 67.6 | 87.5 |
| Is your balance poor when walking? | 81.1 | 62.5 |
| Do your feet suddenly seem to freeze in doorways? | 56.8 | 93.8 |
| Does your face seem less expressive than it used to? | 62.2 | 68.8 |
| Do your arms and legs shake? | 64.9 | 93.8 |
| Do you have trouble doing up buttons? | 81.1 | 75.0 |
| Do you shuffle your feet and take tiny steps when you walk? | 67.6 | 68.8 |

*Data was based on the 37 patients with, and 16 without, PD.*

1. Rocca WA, Maraganore DM, McDonnell SK, Schaid DJ. Validation of a telephone questionnaire for Parkinson's disease. J Clin Epidemiol. 1998 6/1998;51(6):517-23.

## Supplemental Figure 1: The proportion of Amish Men and Women Reporting ≥ 1, 2, 3, 4, 5, Motor Symptoms.
